# Supplementary material for: Pan-sarbecovirus prophylaxis with human anti-ACE2 monoclonal antibodies
Source: PubMed Central journal article supplement (PMC10234812; doi:10.1038/s41564-023-01389-9), 2023-05-15
Supplement: 41564_2023_1389_MOESM1_ESM.pdf [file 41564_2023_1389_MOESM1_ESM.pdf]

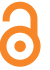

---

# Pan-sarbecovirus prophylaxis with human anti-ACE2 monoclonal antibodies

---

In the format provided by the authors and unedited

## Supplementary information

**Table S1: CDR sequences of anti-hACE2 mAb heavy chains**

|        | Alleles     | CDR1       | CDR2     | CDR3           |
|--------|-------------|------------|----------|----------------|
| 05B04  | IGHV3-23*01 | GFTFSSYA   | ISGSGDRT | AKDWAMVGADAFDI |
| 05D06  | IGHV3-23*01 | GFTFSSYA   | ISISGGST | VKDWYIVGADAFDI |
| 05E10  | IGHV3-23*01 | GFTFSSYA   | INISGGST | VKDWYIMGADAFDI |
| 05G01  | IGHV3-23*01 | GFTFSNYA   | ISINGDRT | AKDWAIVGADAFDV |
| 05H02  | IGHV3-23*01 | GFTFNIYA   | FSGSRYNT | AKEAVAGQFDY    |
| 2G7A1  | IGHV4-59*01 | DGSISGYY   | IHYSGTT  | ARGPVFWYFDL    |
| 2F6A6  | IGHV4-59*01 | DGSISGYY   | IYYSGTT  | ARGPVFWYFDL    |
| 4A12A4 | IGHV3-21*07 | GFTFSSYS   | ITNGINNI | ARYYYYYGMDV    |
| 2C12H3 | IGHV4-4*07  | GGSITSYY   | IFSSGIT  | ARHDGFGWFDP    |
| 1C9H1  | IGHV2-5*01  | GFSLSTPGVA | IFWNDDE  | AHLALYWYFDF    |

**Table S2: CDR sequences of anti-hACE2 mAb light chains**

|        | Alleles     | CDR1      | CDR2 | CDR3        |
|--------|-------------|-----------|------|-------------|
| 05B04  | IGKV1-17*03 | QGISNY    | AAS  | LQHSYYPYT   |
| 05D06  | IGKV1-17*03 | QGISNY    | ATS  | LQHSNYPYT   |
| 05E10  | IGKV1-17*03 | QGISNY    | ATS  | LQHSNYPYT   |
| 05G01  | IGKV1-17*03 | QVISNY    | AGS  | LQHNNYPYT   |
| 05H02  | IGKV1-5*03  | QSISSW    | KAS  | QQYNTYSRT   |
| 2G7A1  | IGLV6-57*01 | SGSINNNY  | DDN  | QSYDSSSRV   |
| 2F6A6  | IGLV6-57*01 | SGSISNSY  | DDN  | QSYDSSSRV   |
| 4A12A4 | IGLV3-19*01 | SLRNYY    | GKN  | NSRDSSGNHVV |
| 2C12H3 | IGKV3-20*01 | QSVSSSY   | GAS  | QQYGSSPRT   |
| 1C9H1  | IGLV2-23*01 | SSDVGSYNL | EGS  | CSYAGSNIVV  |

**Table S3. Cryo-EM data collection, refinement, and validation statistics for 05B04 Fab - hACE2 1-614 complex**

|                                                 |                  |
|-------------------------------------------------|------------------|
| <b>PDB</b>                                      | <b>8E7M</b>      |
| <b>EMD</b>                                      | <b>27939</b>     |
| <b>Data collection conditions</b>               |                  |
| Microscope                                      | Titan Krios      |
| Camera                                          | Gatan K3 Summit  |
| Magnification                                   | 130,000x         |
| Voltage (kV)                                    | 300              |
| Dose rate (e <sup>-</sup> /pixel/s)             | 17.6             |
| Electron dose (e <sup>-</sup> /Å <sup>2</sup> ) | 60               |
| Defocus range (μm)                              | 1.0-2.6          |
| Pixel size (Å)                                  | 0.8677           |
| Micrographs collected                           | 6,599            |
| Micrographs used                                | 4,907            |
| Total extracted particles                       | 2,055,266        |
| Final refined particles                         | 490,485          |
| Symmetry imposed                                | C1               |
| Nominal Map Resolution (Å), FSC=0.143           |                  |
| Global Map (unmasked/masked)                    | 3.9/3.5          |
| Focused Map (unmasked/masked)                   | 3.7/3.3          |
| <b>Refinement and Validation</b>                |                  |
| Initial model                                   | 6VW1, 7S0B, 7DPM |
| Model Resolution (Å)                            |                  |
| FSC 0.143                                       | 3.3              |
| Number of atoms                                 |                  |
| Protein                                         | 8,028            |
| Ligand                                          | 146              |
| MapCC (global/local)                            | 0.79/0.75        |
| Map sharpening B-factor                         | 112.6            |
| R.m.s. deviations                               |                  |
| Bond lengths (Å)                                | 0.004            |
| Bond angles (°)                                 | 0.814            |
| MolProbity score                                | 1.74             |
| Clashscore (all atom)                           | 7.89             |
| Poor rotamers (%)                               | 0                |
| Ramachandran plot                               |                  |
| Favored (%)                                     | 95.5             |
| Allowed (%)                                     | 4.5              |
| Disallowed (%)                                  | 0                |
