# Supplementary material for: Pan-sarbecovirus prophylaxis with human anti-ACE2 monoclonal antibodies
Source: PubMed Central journal article supplement (PMC10234812; doi:10.1038/s41564-023-01389-9), 2023-05-15
Supplement: 41564_2023_1389_MOESM2_ESM.pdf [file 41564_2023_1389_MOESM2_ESM.pdf]

## Reporting Summary

Nature Portfolio wishes to improve the reproducibility of the work that we publish. This form provides structure for consistency and transparency in reporting. For further information on Nature Portfolio policies, see our [Editorial Policies](#) and the [Editorial Policy Checklist](#).

### Statistics

For all statistical analyses, confirm that the following items are present in the figure legend, table legend, main text, or Methods section.

| n/a                                 | Confirmed                                                                                                                                                                                                                                                                           |
|-------------------------------------|-------------------------------------------------------------------------------------------------------------------------------------------------------------------------------------------------------------------------------------------------------------------------------------|
| <input type="checkbox"/>            | <input checked="" type="checkbox"/> The exact sample size ( $n$ ) for each experimental group/condition, given as a discrete number and unit of measurement                                                                                                                         |
| <input type="checkbox"/>            | <input checked="" type="checkbox"/> A statement on whether measurements were taken from distinct samples or whether the same sample was measured repeatedly                                                                                                                         |
| <input checked="" type="checkbox"/> | <input type="checkbox"/> The statistical test(s) used AND whether they are one- or two-sided<br><i>Only common tests should be described solely by name; describe more complex techniques in the Methods section.</i>                                                               |
| <input checked="" type="checkbox"/> | <input type="checkbox"/> A description of all covariates tested                                                                                                                                                                                                                     |
| <input checked="" type="checkbox"/> | <input type="checkbox"/> A description of any assumptions or corrections, such as tests of normality and adjustment for multiple comparisons                                                                                                                                        |
| <input checked="" type="checkbox"/> | <input type="checkbox"/> A full description of the statistical parameters including central tendency (e.g. means) or other basic estimates (e.g. regression coefficient) AND variation (e.g. standard deviation) or associated estimates of uncertainty (e.g. confidence intervals) |
| <input checked="" type="checkbox"/> | <input type="checkbox"/> For null hypothesis testing, the test statistic (e.g. $F$ , $t$ , $r$ ) with confidence intervals, effect sizes, degrees of freedom and $P$ value noted<br><i>Give <math>P</math> values as exact values whenever suitable.</i>                            |
| <input checked="" type="checkbox"/> | <input type="checkbox"/> For Bayesian analysis, information on the choice of priors and Markov chain Monte Carlo settings                                                                                                                                                           |
| <input checked="" type="checkbox"/> | <input type="checkbox"/> For hierarchical and complex designs, identification of the appropriate level for tests and full reporting of outcomes                                                                                                                                     |
| <input checked="" type="checkbox"/> | <input type="checkbox"/> Estimates of effect sizes (e.g. Cohen's $d$ , Pearson's $r$ ), indicating how they were calculated                                                                                                                                                         |

*Our web collection on [statistics for biologists](#) contains articles on many of the points above.*

### Software and code

Policy information about [availability of computer code](#)

Data collection

Data analysis

For manuscripts utilizing custom algorithms or software that are central to the research but not yet described in published literature, software must be made available to editors and reviewers. We strongly encourage code deposition in a community repository (e.g. GitHub). See the Nature Portfolio [guidelines for submitting code & software](#) for further information.

### Data

Policy information about [availability of data](#)

All manuscripts must include a [data availability statement](#). This statement should provide the following information, where applicable:

- Accession codes, unique identifiers, or web links for publicly available datasets
- A description of any restrictions on data availability
- For clinical datasets or third party data, please ensure that the statement adheres to our [policy](#)

The atomic model and cryo-EM map generated for the 05B04-hACE2 complex has been deposited at the Protein Databank (PDB) (<http://www.rcsb.org/>) and the Electron Microscopy Databank (EMDB) (<http://www.emdataresource.org/>) under accession codes 8E7M and EMD-27939, respectively. All other numerical data is in the accompanying source data files and has been deposited with Figshare.

## Human research participants

Policy information about [studies involving human research participants and Sex and Gender in Research](#).

|                             |                                             |
|-----------------------------|---------------------------------------------|
| Reporting on sex and gender | <input type="text" value="not applicable"/> |
| Population characteristics  | <input type="text" value="not applicable"/> |
| Recruitment                 | <input type="text" value="not applicable"/> |
| Ethics oversight            | <input type="text" value="not applicable"/> |

Note that full information on the approval of the study protocol must also be provided in the manuscript.

## Field-specific reporting

Please select the one below that is the best fit for your research. If you are not sure, read the appropriate sections before making your selection.

Life sciences       Behavioural & social sciences       Ecological, evolutionary & environmental sciences

For a reference copy of the document with all sections, see [nature.com/documents/nr-reporting-summary-flat.pdf](https://www.nature.com/documents/nr-reporting-summary-flat.pdf)

## Life sciences study design

All studies must disclose on these points even when the disclosure is negative.

|                 |                                                                                                                                                                                                                                                                                                                                                                                                                                                                                                                                                                                                                                                     |
|-----------------|-----------------------------------------------------------------------------------------------------------------------------------------------------------------------------------------------------------------------------------------------------------------------------------------------------------------------------------------------------------------------------------------------------------------------------------------------------------------------------------------------------------------------------------------------------------------------------------------------------------------------------------------------------|
| Sample size     | <input type="text" value="There was no basis on which to select sample size (number of replicate experiments) prior to completing the study. Sample size was chosen arbitrarily"/>                                                                                                                                                                                                                                                                                                                                                                                                                                                                  |
| Data exclusions | <input type="text" value="No data were excluded from data analysis."/>                                                                                                                                                                                                                                                                                                                                                                                                                                                                                                                                                                              |
| Replication     | <input type="text" value="All attempts reached the same conclusion, numbers of repetitions varies as as stated in the manuscript."/>                                                                                                                                                                                                                                                                                                                                                                                                                                                                                                                |
| Randomization   | <input type="text" value="No allocation was involved in this study."/>                                                                                                                                                                                                                                                                                                                                                                                                                                                                                                                                                                              |
| Blinding        | <input type="text" value="The prophylaxis experiments in which the antibodies provide protection against SARS-CoV-2 infection in human ACE2 knock-in mice was blinded experiment, in that one group of scientists administered antibodies while another group measured the viral RNA. Blinded experiments were also done for antibody evaluation, in which one scientist (JJ) made the antibodies and another scientist (FZ) tested their potency. Under some circumstances, a third scientist (TH) performed neutralization assay using live viruses (Fig 2). Other experiments were not blinded as it was impractical and unnecessary to do so"/> |

## Reporting for specific materials, systems and methods

We require information from authors about some types of materials, experimental systems and methods used in many studies. Here, indicate whether each material, system or method listed is relevant to your study. If you are not sure if a list item applies to your research, read the appropriate section before selecting a response.

### Materials & experimental systems

| n/a                                 | Involvement in the study                                        |
|-------------------------------------|-----------------------------------------------------------------|
| <input type="checkbox"/>            | <input checked="" type="checkbox"/> Antibodies                  |
| <input type="checkbox"/>            | <input checked="" type="checkbox"/> Eukaryotic cell lines       |
| <input checked="" type="checkbox"/> | <input type="checkbox"/> Palaeontology and archaeology          |
| <input type="checkbox"/>            | <input checked="" type="checkbox"/> Animals and other organisms |
| <input checked="" type="checkbox"/> | <input type="checkbox"/> Clinical data                          |
| <input checked="" type="checkbox"/> | <input type="checkbox"/> Dual use research of concern           |

### Methods

| n/a                                 | Involvement in the study                           |
|-------------------------------------|----------------------------------------------------|
| <input checked="" type="checkbox"/> | <input type="checkbox"/> ChIP-seq                  |
| <input type="checkbox"/>            | <input checked="" type="checkbox"/> Flow cytometry |
| <input checked="" type="checkbox"/> | <input type="checkbox"/> MRI-based neuroimaging    |

## Antibodies

|                 |                                                                                                                                                                                                                                                                                                                            |
|-----------------|----------------------------------------------------------------------------------------------------------------------------------------------------------------------------------------------------------------------------------------------------------------------------------------------------------------------------|
| Antibodies used | <input type="text" value="Monoclonal antibodies: anti-HA (BioLegend anti-HA.11, cat 901503, clone 16B12), FITC Anti-CD44 antibody [F10-44-2] (abcam, cat ab30405), and anti-hACE2 monoclonal antibodies including 2G7A1, 05B04, 05D06, 05H02, 1C9H1, 2C12H3, 2F6A6, 4A12A4, 05E10, and 05G01 (developed in this study)."/> |
|-----------------|----------------------------------------------------------------------------------------------------------------------------------------------------------------------------------------------------------------------------------------------------------------------------------------------------------------------------|

Polyclonal antibody: SARS-CoV-2 (COVID-19) Nucleocapsid antibody (GeneTex, cat GTX135357).

Secondary antibodies: goat anti-mouse Alexa Fluor 594 antibody (ThermoFisher Scientific, Cat # A-11005), goat anti-human Alexa Fluor488 antibody (ThermoFisher Scientific, Cat # A-11013), and goat anti-human Alexa Fluor 647 antibody (ThermoFisher Scientific, Cat # A-21445).

Lectin used in immunofluorescence: Wheat Germ Agglutinin, Alexa Fluor™ 594 Conjugate (ThermoFisher Scientific, cat W11262 ) (<https://www.thermoFisher.com/order/catalog/product/W11262>).

#### Validation

anti-HA from BioLegend: tested in western blot (WB), immunocytochemistry (ICC), immunoprecipitation (IP), and flow cytometry (FC) (<https://www.biolegend.com/en-us/products/purified-anti-ha-11-epitope-tag-antibody-11374>).

FITC Anti-CD44 antibody [F10-44-2] from abcam: tested in flow cytometry (FC) (<https://www.abcam.com/fitc-cd44-antibody-f10-44-2-ab30405.html>).

SARS-CoV-2 (COVID-19) Nucleocapsid antibody (GeneTex, cat GTX135357): tested in WB, ICC/F, IHC-P, IHC-Fr, FACS, IP, and ELISA (<https://www.genetex.com/Product/Detail/SARS-CoV-2-COVID-19-Nucleocapsid-antibody/GTX135357>).

## Eukaryotic cell lines

Policy information about [cell lines and Sex and Gender in Research](#)

#### Cell line source(s)

HEK-293T cells (ATCC CRL-3216) and the derivative expressing hACE2, ie 293T/hACE2.cl22 (generated at Rockefeller University, J Exp Med (2020) 217 (11): e20201181. <https://doi.org/10.1084/jem.20201181>); Caco-2 cells (ATCC HTB-37™); human hepatoma-derived Huh-7.5 cells (generated at Rockefeller University <https://doi.org/10.1128/JVI.76.24.13001-13014.2002>); Vero E6 cells and a derivative expressing TMPRSS249 (CRL-1586) ; A549 cells (CRM-CCL-185)

#### Authentication

Not authenticated after purchase from ATCC.

#### Mycoplasma contamination

All cell lines tested negative for mycoplasma contamination.

#### Commonly misidentified lines (See [ICLAC](#) register)

no commonly misidentified cell lines were used in the study

## Animals and other research organisms

Policy information about [studies involving animals](#); [ARRIVE guidelines](#) recommended for reporting animal research, and [Sex and Gender in Research](#)

#### Laboratory animals

AlivaMab Mouse (Ablexis LLC); six-week old hACE2-knock-in female mice, in which human ACE2 cDNA replaces the endogenous mouse ACE2 sequences, were obtained from Jackson Labs (B6.129S2(Cg)-Ace2tm1(ACE2)Dwnt/J, strain 035000).

#### Wild animals

no wild animals were used in the study

#### Reporting on sex

No sex- and gender-based analysis was done since it is irrelevant to this study. We followed the procedure used in the Nature paper (Zhou B, 2021, Nature doi: 10.1038/s41586-021-03361-1), including animal sex.

#### Field-collected samples

no field collected samples were used in the study.

#### Ethics oversight

the Rockefeller University Institutional Animal Care and Use Committee (IACUC)

Note that full information on the approval of the study protocol must also be provided in the manuscript.

## Flow Cytometry

### Plots

Confirm that:

- The axis labels state the marker and fluorochrome used (e.g. CD4-FITC).
- The axis scales are clearly visible. Include numbers along axes only for bottom left plot of group (a 'group' is an analysis of identical markers).
- All plots are contour plots with outliers or pseudocolor plots.
- A numerical value for number of cells or percentage (with statistics) is provided.

### Methodology

#### Sample preparation

The ACE2 expressing cells were detached from plates with 10 mM EDTA in PBS and then incubated in the absence or the presence of human anti-hACE2 mAbs (2 µg/ml) for 2 hr at 4°C. After washing, the cells were incubated with AlexaFluorTM 488 (or Alexa FluorTM 647 when indicated) conjugated goat anti-human IgG (ThermoFisher Scientific).

#### Instrument

Attune® NxT Acoustic Focusing Cytometer (ThermoFisher Scientific)

Software

Cell population abundance

Gating strategy .

Tick this box to confirm that a figure exemplifying the gating strategy is provided in the Supplementary Information.
